# Supplementary material for: Nasal administration of anti-CD3 monoclonal antibody modulates effector CD8+ T cell function and induces a regulatory response in T cells in human subjects
Source: PubMed Central journal article supplement (PMC9727230; doi:10.3389/fimmu.2022.956907), 2022-11-23
Supplement: DataSheet_1.pdf [file DataSheet_1.pdf]

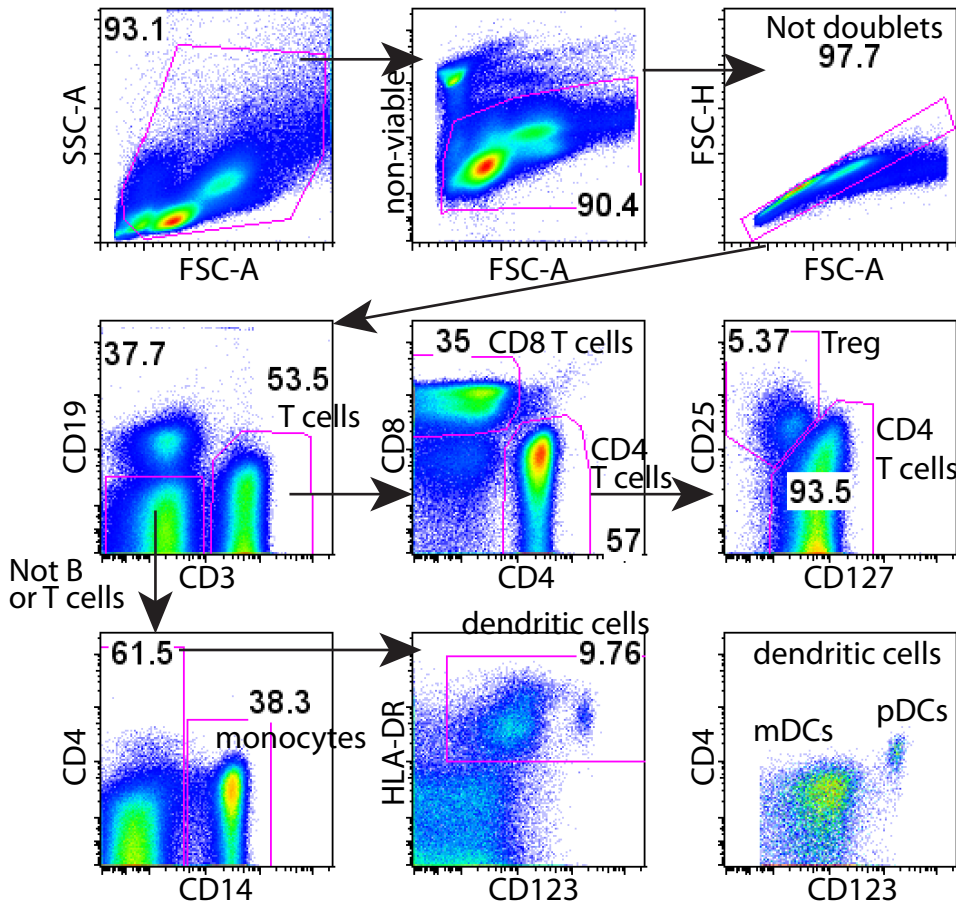

| Stain              | clone  | Source                   |
|--------------------|--------|--------------------------|
| e506 viability dye |        | Thermo Fisher Scientific |
| CD19 APC/Fire 750  | H1B19  | BioLegend                |
| CD3 APC            | OKT3   | BioLegend                |
| CD8 AF700          | L307.4 | Becton Dickenson         |
| CD4 BV785          | OKT4   | BioLegend                |
| CD25 PE            | BC96   | BioLegend                |
| CD127 Pacific Blue | A019D5 | BioLegend                |
| CD14 BV650         | M5E2   | BioLegend                |
| HLA-DR PerCPCy5.5  | L243   | BioLegend                |
| CD123 PeCy7        | 6H6    | BioLegend                |

**Supplementary Figure 1.** FACS gating for isolation of the specific immune populations examined by single cell RNA-Seq by 10X genomics. Longitudinal PBMCs from T1-T4 after Foralumab nasal treatment (50ug/ml dose) were stained with e506, FcR block, and then with the indicated Mabs to allow isolation of viable subsets of CD8+ T cells, non-regulatory CD4+ T cells (not CD25<sup>hi</sup>CD127<sup>low</sup>), CD4+ Tregs (CD25<sup>hi</sup>CD127<sup>low</sup>), total monocytes, and total DCs. The samples were hash-tagged and each scRNA-Seq samples was generated with the same type of sorted immune population.
