# Supplementary material for: Nasal administration of anti-CD3 monoclonal antibody modulates effector CD8+ T cell function and induces a regulatory response in T cells in human subjects
Source: PubMed Central journal article supplement (PMC9727230; doi:10.3389/fimmu.2022.956907), 2022-11-23
Supplement: DataSheet_2.pdf [file DataSheet_2.pdf]

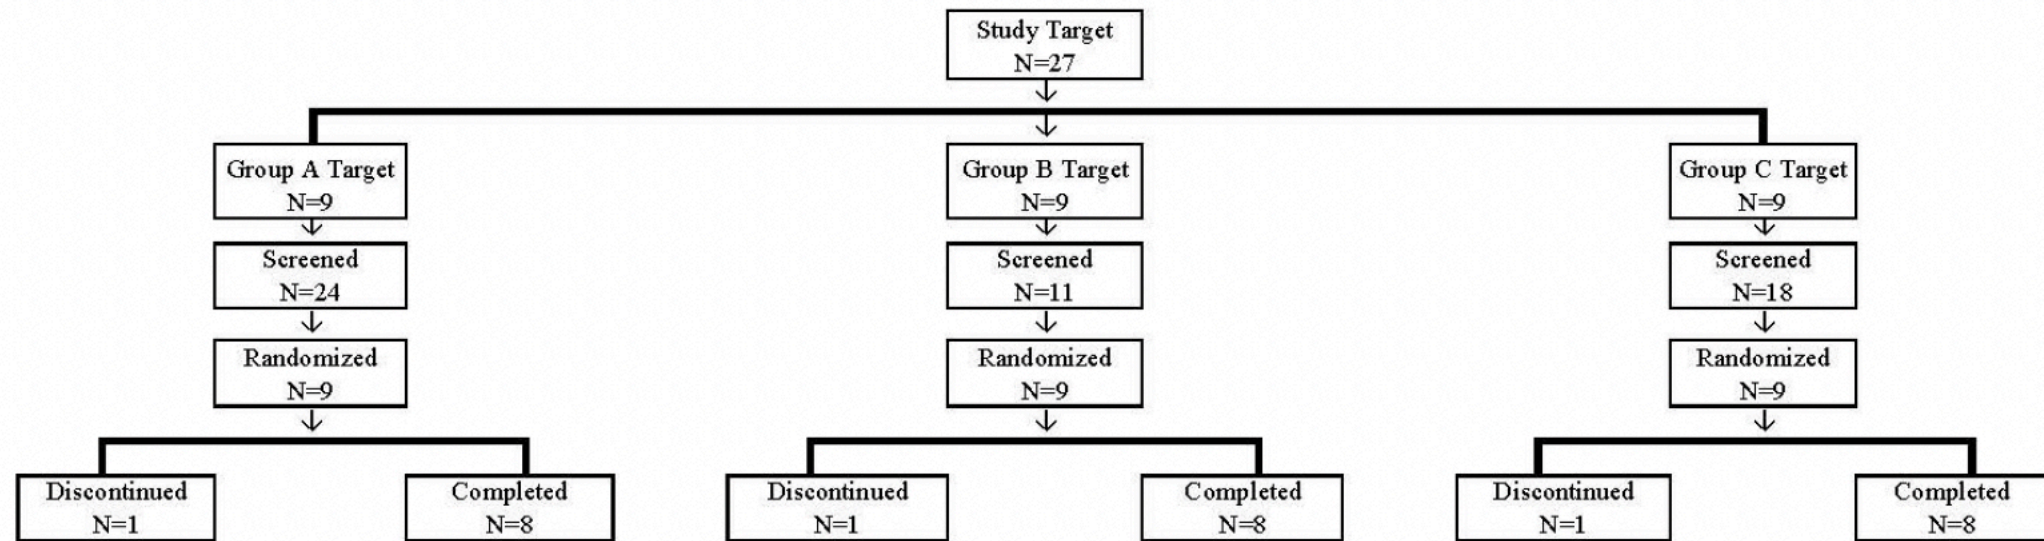

**Supplementary Figure 2.** Patient disposition.
