# Supplementary material for: Nasal administration of anti-CD3 monoclonal antibody modulates effector CD8+ T cell function and induces a regulatory response in T cells in human subjects
Source: PubMed Central journal article supplement (PMC9727230; doi:10.3389/fimmu.2022.956907), 2022-11-23
Supplement: DataSheet_5.pdf [file DataSheet_5.pdf]

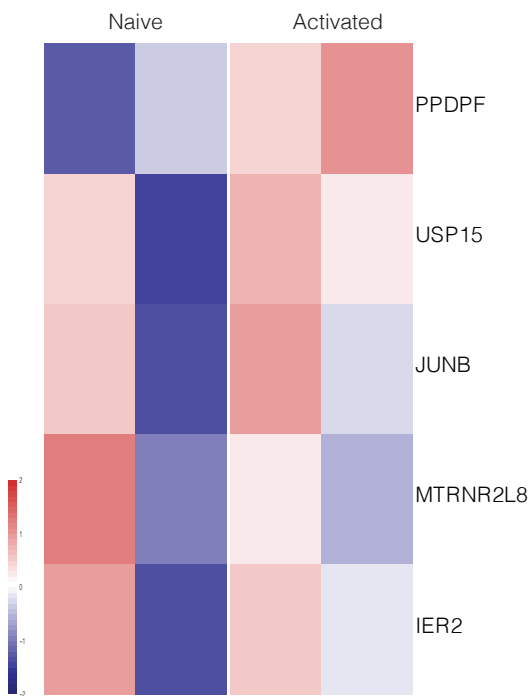

**Supplementary Figure 5.** Treg heat map. The DEG found between baseline (T1) and T2 in CD4+CD25<sup>hi</sup> CD127<sup>lo</sup> Tregs are shown for naïve Tregs and activated (memory) Tregs.
